# Supplementary material for: Safety and Efficacy of Combination Maintenance Therapy with Ixazomib and Lenalidomide in Patients with Posttransplant Myeloma
Source: Oxford University Press journal article supplement (doi:10.1158/1078-0432.ccr-21-3420), 2022-01-05
Supplement: ccr-21-3420_supplementary_table_1_suppst1.docx [file ccr-21-3420_supplementary_table_1_suppst1.docx]

Supplementary table 1. Induction Regimens Used Prior to ASCT

| **Type of regimen** | **Regimen components** | **Number of patients** |
| --- | --- | --- |
| Doublet regimens | Dexamethasone plus bortezomib or lenalidomide | 10 |
| Triplet regimens | Bortezomib, dexamethasone plus lenalidomide or cyclophosphamide | 40 |
| Quadruplet regimens | Bortezomib, lenalidomide, dexamethasone plus panabinostat or siltuximab or cyclophosphamide | 11 |
| Other |  | 3 |
| Intensive regimen prior to induction |  | 7 |
